# Supplementary material for: Graphene Oxide Nano-Concentrators Selectively Modulate RNA Trapping According to Metal Cations in Solution
Source: PubMed Central journal article supplement (PMC7261913; doi:10.3389/fbioe.2020.00421), 2020-05-25

## Supplementary Information

### Graphene Oxide Nano-concentrators Selectively Modulate RNA Trapping According to Metal Cations in Solution

Valentina Palmieri\*<sup>1,2#</sup>, Lorena Di Pietro\*<sup>3</sup>, Giordano Perini<sup>1,2</sup>, Marta Barba<sup>3,2</sup>, Ornella Parolini<sup>3,2</sup>, Marco De Spirito<sup>1,2</sup>, Wanda Lattanzi<sup>3,2</sup>, Massimiliano Papi<sup>1,2#</sup>

<sup>1</sup> Dipartimento di Neuroscienze, Università Cattolica del Sacro Cuore, Roma, Italy

<sup>2</sup> Fondazione Policlinico Universitario A. Gemelli IRCSS, Roma, Italy

<sup>3</sup> Dipartimento di Scienze della Vita e Sanità Pubblica, Università Cattolica del Sacro Cuore, Roma, Italy

\* These authors contributed equally

# Corresponding author: [Massimiliano.papi@unicatt.it](mailto:Massimiliano.papi@unicatt.it), [valentina.palmieri@unicatt.it](mailto:valentina.palmieri@unicatt.it)

**Table S1 Lateral Size (LS) of GO samples obtained by peak of intensity size distribution according to Lotya et al. 2013 compared to AFM data**

| Sample       | R <sub>H</sub> (nm) | LS (nm)  |
|--------------|---------------------|----------|
| GO (AFM)     | R=350±80            | 700±160  |
| GO           | 515±19              | 818±45   |
| GO+Ca 0.5 mM | 1386±100            | 3612±390 |
| GO+Ca 5 mM   | 1296±104            | 3266±395 |
| GO+Mg 0.5 mM | 1407±242            | 3694±950 |
| GO+Mg 5 mM   | 1181±136            | 2840±490 |

**Figure S1 Representative intensity size distributions of GO samples obtained by DLS**

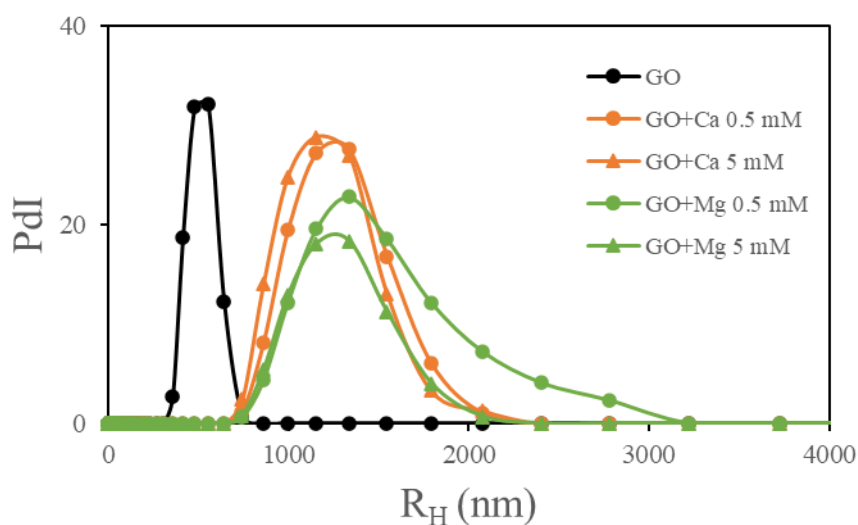

Supplement: Data_Sheet_1.pdf [file Data_Sheet_1.pdf]
